# Supplementary material for: An Effort to Use Human-Based Exome Capture Methods to Analyze Chimpanzee and Macaque Exomes
Source: PLoS One. 2012 Jul 27;7(7):e40637. doi: 10.1371/journal.pone.0040637 (PMC3407233; doi:10.1371/journal.pone.0040637)
Supplement: Table S2 — Data production. Summary of captured target sequence coverage for each non-human primate exome and two human exomes. (XLSX) [file pone.0040637.s002.xlsx]

## Sheet: Sheet1
	CE1	CE2	JP1	JP2	JP3	JP4	JP5	JP6	JP7	JP8	CM1	CM2	CM3	CM4	CM5	CM6	CM7	CM8	CM9	HM1	HM2
Target region (bp)	37627322	37627322	45880359	45880359	45880359	45880359	45880359	45880359	45880359	45880359	37627322	37627322	37550058	37627322	37550058	37550058	37550058	37550058	37627322	37627322	37627322
# of clean reads	31713024	51119576	88843528	89929844	92983282	98141290	105383206	99120492	113648090	99405360	30937512	28430668	30017374	25009766	28129520	29441054	26661930	22003674	27327830	25556890	25556890
Reads mapped to human genome	18116558	28045036	50111198	49634779	48807874	57906139	59319225	56693951	66813713	56127340	26539446	24548116	25292860	21401242	23903490	25411008	22292891	19138602	23318442	23577674	23351937
(fraction of clean reads)	0.5713	0.5486	0.564	0.5519	0.5249	0.59	0.5629	0.572	0.5879	0.5646	0.8578	0.8634	0.8426	0.8557	0.8498	0.8631	0.8361	0.8698	0.8533	0.9226	0.9137
Reads mapped to human genome after filter duplication	17662286	27300009	45815732	43886382	40842376	50542071	49772669	50071345	57099772	49467908	25176205	23548572	23590166	20488301	22290620	24213230	20836030	17911347	21946502	22738268	22419558
(fraction of clean reads)	0.5569	0.534	0.5157	0.488	0.4392	0.515	0.4723	0.5052	0.5024	0.4976	0.8138	0.8283	0.7859	0.8192	0.7924	0.8224	0.7815	0.814	0.8031	0.8897	0.8772
Reads mapped to own genome	27020210	45917029	79812621	79786333	80879468	88703243	94858196	89204509	102905720	89632585	26126288	24497753	26379277	22363195	24904702	26362052	23300117	19818204	24212586	23577674	23351937
(fraction of clean reads)	0.852	0.8983	0.8984	0.8872	0.8698	0.9038	0.9001	0.9	0.9055	0.9017	0.8445	0.8617	0.8788	0.8942	0.8854	0.8954	0.8739	0.9007	0.886	0.9226	0.9137
Reads mapped to target region	14258063	21044669	37779349	36054142	32241236	43196075	40631468	41668529	48407583	40515597	18720169	17737374	17985641	15324831	16832581	18401561	15631258	13553463	15824140	17078134	17349806
(fraction of clean reads)	0.4496	0.4117	0.4252	0.4009	0.3467	0.4401	0.3856	0.4204	0.4259	0.4076	0.6051	0.6239	0.5992	0.6128	0.5984	0.625	0.5863	0.616	0.579	0.6682	0.6789
Mean depth of target region	30.72	45.77	65.65	62.81	56.07	75.31	70.79	72.66	84.43	70.41	38.42	36.44	38.24	32.24	35.59	38.96	33.12	28.81	33.43	35.41	36.14
Coverage of target region	0.9106	0.927	93.21	93.47	93.22	93.22	93.13	93.18	93.52	93.35	0.9712	0.9731	97.2	97.08	97.19	97.5	96.88	96.95	97.2	0.9708	0.9773
Capture specificity	0.5277	0.4583	0.4734	0.4519	0.3986	0.487	0.4283	0.4671	0.4704	0.452	0.7165	0.724	0.6818	0.6853	0.6759	0.698	0.6709	0.6839	0.6536	0.7243	0.743
Fraction of target covered >=4X	0.8114	0.8367	86.58	87.2	86.68	87.08	86.83	86.93	87.86	87.08	91.64	91.64	91.53	90.58	91.3	92.24	90.3	89.57	90.77	91.3	92.27
Fraction of target covered >=10X	0.6759	0.7232	77.99	78.63	77.69	79.18	78.62	78.89	80.54	78.89	80.41	79.82	79.92	77.33	79.14	81.33	77.2	73.59	76.99	79.09	79.91
Rate of nucleotide mismatch (%)	2.9	2.76	2.75	2.8	2.9	2.68	2.76	2.72	2.69	2.75	1.12	1.1	1.02	1.01	1.02	0.97	1.03	0.96	1	0.44	0.48
Mean depth of chrX	41.73	62.85	50.49	44.48	41.61	58.24	55.34	102.77	123.89	103.01	46.29	22.87	45.9	20.45	42.37	46.41	39.71	34.13	20.48	45.07	44.4
Mean depth of chrY	3.1	4.5	19.48	17.19	16.44	22.98	22.69	9.02	11.09	8.94	4	44.44	3.63	44.19	3.9	3.93	3.6	3.09	39.9	1.52	1.62
Gender	F	F	F	F	F	F	F	F	F	F	F	M	F	M	F	F	F	F	M	F	F
