# Supplementary material for: An Effort to Use Human-Based Exome Capture Methods to Analyze Chimpanzee and Macaque Exomes
Source: PLoS One. 2012 Jul 27;7(7):e40637. doi: 10.1371/journal.pone.0040637 (PMC3407233; doi:10.1371/journal.pone.0040637)
Supplement: Table S3 — Indels. Indels of 21 individuals identified through aligning the exomes to the human reference genome. (XLSX) [file pone.0040637.s003.xlsx]

## Sheet: Sheet1
	CE1	CE2	JP1	JP2	JP3	JP4	JP5	JP6	JP7	JP8	CM1	CM2	CM3	CM4	CM5	CM6	CM7	CM9	CM8	HM1	HM2
Total number of indels	13890	17417	17316	17131	16626	17828	17538	17717	18203	17503	6840	6955	6775	6771	6744	7105	6618	6501	5934	773	697
Ins-coding	698	910	1053	1052	1022	1074	1061	1069	1160	1088	432	449	426	404	432	455	428	419	403	93	84
Del-coding	607	698	680	694	669	694	692	714	723	706	360	372	362	367	364	362	362	349	345	59	56
Splice site	885	1078	839	811	807	837	829	834	857	851	372	395	286	297	288	302	288	268	237	45	33
Intron	10813	13615	13655	13459	13048	14103	13845	13986	14333	13744	5172	5221	5172	5169	5130	5424	5029	4941	4460	518	465
5' UTRs	256	341	339	347	327	346	349	348	354	346	182	189	187	192	197	202	185	193	186	22	29
3' UTRs	579	709	687	707	692	709	699	701	709	707	274	279	287	290	285	308	274	278	253	30	25
Intergenic	52	66	63	61	61	65	63	65	67	61	48	50	55	52	48	52	52	53	50	6	5
Total insertion	7460	9589	11009	10843	10575	11369	11161	11297	11613	11152	3661	3698	3743	3742	3757	3943	3664	3571	3284	437	395
Total deletion	6430	7828	6307	6288	6051	6459	6377	6420	6590	6351	3179	3257	3032	3029	2987	3162	2954	2930	2650	336	302
Heterozygous indels	378	536	288	269	268	299	299	304	324	309	458	489	490	482	463	500	454	434	302	280	240
Homozygous indels	13512	16881	17028	16862	16358	17529	17239	17413	17879	17194	6382	6466	6285	6289	6281	6605	6164	6067	5632	493	457
