# Supplementary material for: An Effort to Use Human-Based Exome Capture Methods to Analyze Chimpanzee and Macaque Exomes
Source: PLoS One. 2012 Jul 27;7(7):e40637. doi: 10.1371/journal.pone.0040637 (PMC3407233; doi:10.1371/journal.pone.0040637)
Supplement: Table S4 — Sanger sequencing validation result of SNP and Indels. (XLS) [file pone.0040637.s004.xls]

## Sheet: SNV
Site NO	Chromosome	Position	HM ref	IR ref	CE1 prediction	CE2 prediction	CE1	CE2	gene	Forward primer(5'-3')	Reverse primer(5'-3')		Annealing temperature of PCR (℃)
1	chr10	88651915	G	G	G	K	G	G	BMPR1A	GCTTTGCCAGTAAATCACAT	AGACAGAACGTATTCCTCCA		56.3
2	chr11	17408630	C	T	T	T	T	T	KCNJ11	GATGCTGAACTTGGGCTTGG	TGGACATCCCTATGGAGAACG		60.5
3	chr11	32634980	C	T	G	G	G	G		GGGCAAAGCTGGACAGGA	GCTACTCAGGAGGCTAACG		57
4	chr1	155206158	G	G	G	G	G	G	GBA	AGGAATCCACAGTTGGGTAG	TGGGCAGTGACAGTTGAAAA		61
5	chr1	155207229	C	T	Y	Y	Y	Y	GBA	GAAGTGGAACGAGGTTGAGG	GCTGTAGGGTAGGTCTGCTTG		59.9
6	chr11	59940599	T	T	K	K	G	G	MS4A6A	ATGTCTGGCTGGTTGTTCCT	TCTCAGTCCTGGGAGTTATT		58.7
7	chr1	201334328	T	C	C	C	C	C	MS4A6A	TCTGGCAGTCAAGGAGCA	AGAGCACAGGTGGGATGG		62
8	chr12	103237462	G	A	A	A	A	A	PAH	CTCTGTATGCAGGAGGGTT	TAGATGAGCTATGAAGGGT		58
9	chr13	20763453	G	G	G	R	G	R	GJB2	TTGATCTCCTCGATGTCCTTA	GCTTACCCAGACCCACAGAA		57.8
10	chr13	32893317	C	T	T	T	T	T	BRCA2	TCTTTAACTGTTCTGGGTCA	CCATATCGCATTACTTACCT		53.1
11	chr13	32953553	A	A	A	R	R	R	BRCA2	CAGTTTGAGGCACCTGAGAA	GACGCAATGGAAGAAGTGAT		57
12	chr13	52511743	T	C	Y	C	C	C	ATP7B	CACTCTGATGAGGACGACG	GGGAGCCAGGGATGAACT		58.9
13	chr13	52511771	C	T	Y	T	T	T	ATP7B	CACTCTGATGAGGACGACG	GGGAGCCAGGGATGAACT		58.9
14	chr13	52548543	G	A	A	G	A	G	ATP7B	GGGTCATACTGTACTTGGG	TCACTTATCAGCCTTATCTCA		58.7
15	chr14	23884924	C	C	G	C	C	C	MYH7	ATGGCCTTCTTGGCTTTCTC	GCTCCCTACTCATGCCCACTCT		60.2
16	chr17	41245090	T	C	C	C	C	C	BRCA1	CCTAGAGCCTCCTTTGAT	TACCGATTATGGCACTCA		54.8
17	chr17	41245893	C	G	G	G	G	G	BRCA1	TCAGTACAATTAGGTGGGCTTAG	AGATAATGCAAGAGCGTCCC		58.7
18	chr17	41246061	C	C	C	C	C	C	BRCA1	TTGGTTAGTTCCCTGATT	AATGCTAATGCCCTGTAT		50
19	chr17	4805987	G	G	T	T	T	T	CHRNE	ACTGTTCCCCAGATTTGACT	AATGACCCTTCCTGCTTGAC		58.7
20	chr18	47365593	A	A	G	G	G	G		CACTGGGAAGGTTCTGGCTAT	GGGATTTGGACTGAGCGATT		59.4
21	chr20	56137895	G	C	C	C	C	C	PCK1	TTCAGCAGGCTCTTCACTC	GGTTGCAGGGCCAGTTGT		58
22	chr2	113950140	T	T	G	G	G	G		ATCTGAGGACACCGATGAAC	GTATGCCCTGCTACCCTATT		60.2
23	chr2	116535402	G	G	C	C	C	C		AGATTCAATGTGACAAGGTG	ATGAGACTTAGCAGGAGATG		55.1
24	chr21	33642080	A	A	G	G	A	G		CAAGGCTATTTATACCAC	CAATCCTCTTGCGTCAGC		55
25	chr22	19052534	C	C	T	T	T	T		ATCCAGGACTCACTTGCG	CCACTTCTTTAGGGTGATT		55
26	chr2	38298272	C	C	C	Y	Y	C	CYP1B1	AGAATCGAGCTGGATCAAAG	AGAGTGTTAATCACGCAAGG		56.7
27	chr3	108135776	G	A	A	A	A	A		CCCATAACTTGTAGGGCATTT	TGTGGGTAGGAGTCATTCT		58.4
28	chr3	12458448	C	T	C	Y	Y	Y	PPARG	CTTTCAGGGCTGCCAGTTTC	CCAAGTCGCTGTCATCTAAT		58.4
29	chr4	23815662	C	T	T	T	T	T	PPARGC1A	TTGGGTGGTGACACGGAATC	TCGGAGGCAAGCAAGCAGGT		59.8
30	chr5	140868909	A	A	G	G	G	G		GGCTAGAAGGAGACATAAGA	CACATAGGCTTTCTCGGTCA		56.8
31	chr5	42699970	G	G	G	R	G	R	GHR	CTCATGTCTCAATTCCGTAG	GTGACATCTTACCATTTTCC		57.4
32	chr6	64421086	A	A	W	W	W	W		AGTGGGTCAAGAACATAG	GTTGTTAGCAGCTACTCC		56.3
33	chr7	44187344	C	T	T	T	T	T	GCK	TGGAGCTTACGAAAGGATTGT	CAGGGAAGGTGTTATTGTTGC		57.4
34	chr7	44190669	G	G	G	G	G	G	GCK	CCTGGCCCACCTTATCGA	TGGAGCCTCAGGAACAGC		59
35	chr7	72880727	C	c	T	T	T	T		ACTCACTGGCATCACTAT	AGCGATTCCACCTCAGCA		57
36	chr7	99367427	C	C	Y	C	C	C	CYP3A4	CCAACAGTGGGAATATCAGC	TTGGTCCAGTGGGATTTATG		56.5
37	chr9	96860345	G	G	A	A	A	A		AAAGGCGGCTCAGCTACAGT	CACTTGCTGGTGAGTAGGGT		61
38	chrX	12903659	A	A	A	G	A	G	TLR7	GTTTAGCGGGTCAACATCAA	GTCCACGATCACATGGTTCT		57
39	chrX	153132227	C	C	T	T	T	T	L1CAM	TTGACGGCCTGGACTTTGAT	CGGAGAAGAACCCTGTAGAT		58
40	chrX	70330453	T	C	T	T	T	T	IL2RG	ACTCCAATGTCCCACAGTATC	TTCCTGACCTCTATGCCCAC		60
41	chrX	78216680	T	T	G	G	G	G		AGGACTTTGCCTGCTCTGC	GACAATGGGACAACTGCT		56
	Note
	Red color markered:wrong prediction
	-:no data because of unsuccessful sequencing
	W:A/T
	K:T/G
	Y:C/T
	R:A/G

## Sheet: indel
Indel NO.	HM chr	HM Indel_start	HM Indel_end	CE1 predect	CE2 predect	CE1	CE2	Gene	Indel type	Hom/Het	Forward primer(5'-3')	Reverse primer(5'-3')	Annealing temperature of PCR (℃)	NCBI-HIV protein interaction	IR chr	IR start	IR end
1	chr10	82049133	82049134	CTT	CTT	CTT	CTT	MAT1A	indelType=+3	Homo	AGTTACAGTCAGATAGGA	ACAAGCCTGTTGAGTTGA	51	-	chr9	57108472	57108476
2	chr10	90773106	90773108	TGG	TGG	TGG	TGG	FAS	indelType=-3	Homo	TCAGTGGGAGTTAGGATTC	CTGAGCAGGTAAAATTGT	53	HIV-1 protein interaction	chr9	88596000	88596001
3	chr1	156146761	156146763	AAC	AAC	AAC	AAC	SEMA4A	indelType=-3	Homo	CACTGTCCTCCTCGCCTTAG	GCAGACTGCTTCGCATCACC	61	-	chr1	134782085	134782087
4	chr11	5701144	5701145	TCT	TCT	TCT	TCT	TRIM5	indelType=+3	Homo	CCATCTAACCCAAGGTAC	CTGCGAACCACAAGAAGTCC	56	HIV-1 protein interaction	chr14	67657375	67657379
5	chr1	197070100	197070101	G	G	-	-	ASPM	indelType=+1	Homo	TTCGTAGGGCAGCACATTTC	TCTCCACCTTAGAGCAACAG	59	-	chr1	173440218	173440219
6	chr12	1003739	1003740	CAG	CAG	CGA	CGA	WNK1	indelType=+3	Homo	CGTCCTCAGTAACATCTCAT	TATGTCCCAAATAGGTAGGC	56.5	-	chr11	885277	885281
7	chr12	998371	998372	ACT	ACT	ACT	ACT	WNK1	indelType=+3	Homo	AGATCGCACAAATAAACAAC	GGCTAGAATAAGCAGGGAC	55	-	chr11	880628	880632
8	chr10	61819153	61819153	GC	GC	-	-	ANK3	indelType=+2	Homo	CCCAGAACTAGAATGGTAAT	ATGCCTGAAGCAGTGGATGT	55	-	chr9	77227481	77227481
9	chr4	123374911	123374911	TAT	TAT	TAT	TAT	IL2	indelType=+3	Homo	GAGTTTGGGATGAGGCTTGTCC	ACTCTACTGGTCCATCTTTA	55.5	HIV-1 protein interaction	chr5	114848923	114848923
10	chr1	212792406	212792407	T	T	T	T	ATF3	indelType=+1	Homo	AGTCTTAACCCAGGTCCCACA	GAGCCTTCAGTTCAGCATTCAC	60	HIV-1 protein interaction	chr1	157794410	157794411
11	chr1	59248129	59248130	GCGGCGGCG	GCGGCGGCG	GCGGCGGCG	GCGGCGGCG	JUN	indelType=+9	Homo	GGCATCTCGGGCACTGTCT	TCCAGCAACGGGCACATCAC	58.6	HIV-1 protein interaction	chr1	61630030	61630031
12	chr14	95570040	95570045	GGCTGG	GGCTGG	GGCTGG	GGCTGG	DICER1	indelType=-6	Homo	TTTCAAGCCGCTCCAGGTTA	TCTCGCCAATGGCAGTTATG	58.6	-	chr7	158343112	158343117
13	chr15	89873402	89873404	GCT	GCT	GCT	GCT	POLG	indelType=-3	Homo	AGCAAGCAGTGCCTTCCCTA	GGTCTAATAGCCCAGTAGTTCC	61.2	-	chr7	68959328	68959330
14	chr17	40946845	40946847	TCC	TCC	TCC	-	WNK4	indelType=-3	Homo	GGAGGAGCCAGCACCATTAC	TGACCTGAGAACAAGTGGGAG	62	-	chr16	52916116	52916118
15	chr19	44778004	44778004	TGTAAA	TGTAAA	TGTAAA	TGTAAA	ZNF233	indelType=+6	Homo	CAGAACTCCTGTCTTCCCTC	ATGCGAACTCTGACTAAAGC	58	-	chr19	50698341	50698341
16	chr19	44778269	44778269	ATGTA	ATGTA	ref type	ATGTA	ZNF233	indelType=+5	Homo	GCCTGTAAATGTAAATGTGATG	AGATGCGAACTCTGACTAAA	55	-	chr19	50698612	50698612
17	chr2	169757851	169757851	T	T	T	T	G6PC2	indelType=-1	Homo	CAGATCAGCAGGTACTTCAC	GATCATTATGCCAAAGCCAC	56	-	chr12	32541313	32541313
18	chr2	242065693	242065698	ATCACG	ATCACG	ATCACG	ATCACG	PASK	indelType=-6	Homo	CCCAAGTGCTGCGAGGAGTG	TGTAGCAAGCGACGGAGAA	62	-	chr12	105029087	105029092
19	chr5	38921836	38921844	TCGGTGATT	TCGGTGATT	-	TCGGTGATT	OSMR	indelType=-9	Homo	TAGGTGCTGAAGTCTGGTTG	AAATCCCACTTGAACTTGCT	55.5	-	chr6:	38753047	38753049
20	chr9	103055190	103055192	CCC	CCC	CCC	CCC	INVS	indelType=-3	Homo	TGGCTGGGCCTGATGAGAAA	ATGACTGCCGCTGCCTTGTT	59	-	chr15	35930339	35930358
			note
			-:no data because of unsuccessful sequencing
